# Supplementary material
Source: publisher figshare collection journal article supplement (https://tandf.figshare.com/ndownloader/files/21269445)
Supplement: Supplementary file 1 [file 21269445]

## Sheet: hive experiment
Numbers of bees that returned to the nest or became lost
colony	treatment	returned to the nest	lost
1	control	84	16
1	CO2	41	59
2	control	70	7
2	CO2	42	35
3	control	87	13
3	CO2	31	69

## Sheet: short-term memory
no. of bees	colony	treatment	learning after 5 sessions (1-reaction/0-no reaction)	test (1-reaction/0-no reaction)			short-term memory test
1	1	control	1	1					no. of bees
2	1	control	1	1			colony	treatment	reaction	no reaction
3	1	control	1	1			1	control	33	4
4	1	control	1	1			1	CO2	11	26
5	1	control	1	1			2	control	28	3
6	1	control	1	1			2	CO2	14	17
7	1	control	1	1			3	control	30	6
8	1	control	1	1			3	CO2	1	35
9	1	control	1	1
10	1	control	1	1
11	1	control	1	1
12	1	control	1	0
13	1	control	1	1
14	1	control	1	1
15	1	control	1	1
16	1	control	1	1
17	1	control	1	1
18	1	control	1	0
19	1	control	1	1
20	1	control	1	1
21	1	control	1	1
22	1	control	1	1
23	1	control	1	1
24	1	control	1	1
25	1	control	1	1
26	1	control	1	1
27	1	control	1	1
28	1	control	1	0
29	1	control	1	0
30	1	control	1	1
31	1	control	1	1
32	1	control	1	1
33	1	control	1	1
34	1	control	1	1
35	1	control	1	1
36	1	control	1	1
37	1	control	1	1
1	1	CO2	1	0
2	1	CO2	1	0
3	1	CO2	1	0
4	1	CO2	1	0
5	1	CO2	1	1
6	1	CO2	1	1
7	1	CO2	1	1
8	1	CO2	1	1
9	1	CO2	1	0
10	1	CO2	1	0
11	1	CO2	1	0
12	1	CO2	1	0
13	1	CO2	1	0
14	1	CO2	1	0
15	1	CO2	1	1
16	1	CO2	1	0
17	1	CO2	1	0
18	1	CO2	1	1
19	1	CO2	1	0
20	1	CO2	1	0
21	1	CO2	1	0
22	1	CO2	1	0
23	1	CO2	1	0
24	1	CO2	1	0
25	1	CO2	1	0
26	1	CO2	1	0
27	1	CO2	1	0
28	1	CO2	1	1
29	1	CO2	1	0
30	1	CO2	1	0
31	1	CO2	1	0
32	1	CO2	1	0
33	1	CO2	1	1
34	1	CO2	1	1
35	1	CO2	1	0
36	1	CO2	1	1
37	1	CO2	1	1
1	2	control	1	1
2	2	control	1	1
3	2	control	1	1
4	2	control	1	1
5	2	control	1	1
6	2	control	1	1
7	2	control	1	1
8	2	control	1	0
9	2	control	1	1
10	2	control	1	1
11	2	control	1	1
12	2	control	1	1
13	2	control	1	1
14	2	control	1	0
15	2	control	1	0
16	2	control	1	1
17	2	control	1	1
18	2	control	1	1
19	2	control	1	1
20	2	control	1	1
21	2	control	1	1
22	2	control	1	1
23	2	control	1	1
24	2	control	1	1
25	2	control	1	1
26	2	control	1	1
27	2	control	1	1
28	2	control	1	1
29	2	control	1	1
30	2	control	1	1
31	2	control	1	1
1	2	CO2	1	1
2	2	CO2	1	1
3	2	CO2	1	0
4	2	CO2	1	0
5	2	CO2	1	1
6	2	CO2	1	0
7	2	CO2	1	0
8	2	CO2	1	0
9	2	CO2	1	1
10	2	CO2	1	0
11	2	CO2	1	1
12	2	CO2	1	0
13	2	CO2	1	1
14	2	CO2	1	0
15	2	CO2	1	0
16	2	CO2	1	0
17	2	CO2	1	1
18	2	CO2	1	1
19	2	CO2	1	0
20	2	CO2	1	0
21	2	CO2	1	1
22	2	CO2	1	1
23	2	CO2	1	1
24	2	CO2	1	0
25	2	CO2	1	0
26	2	CO2	1	1
27	2	CO2	1	0
28	2	CO2	1	0
29	2	CO2	1	1
30	2	CO2	1	0
31	2	CO2	1	1
1	3	control	1	1
2	3	control	1	1
3	3	control	1	1
4	3	control	1	1
5	3	control	1	1
6	3	control	1	1
7	3	control	1	1
8	3	control	1	1
9	3	control	1	1
10	3	control	1	1
11	3	control	1	1
12	3	control	1	1
13	3	control	1	1
14	3	control	1	0
15	3	control	1	1
16	3	control	1	0
17	3	control	1	1
18	3	control	1	1
19	3	control	1	1
20	3	control	1	1
21	3	control	1	1
22	3	control	1	1
23	3	control	1	0
24	3	control	1	1
25	3	control	1	1
26	3	control	1	1
27	3	control	1	1
28	3	control	1	1
29	3	control	1	0
30	3	control	1	1
31	3	control	1	1
32	3	control	1	1
33	3	control	1	1
34	3	control	1	1
35	3	control	1	0
36	3	control	1	0
1	3	CO2	1	0
2	3	CO2	1	0
3	3	CO2	1	0
4	3	CO2	1	0
5	3	CO2	1	0
6	3	CO2	1	0
7	3	CO2	1	0
8	3	CO2	1	0
9	3	CO2	1	0
10	3	CO2	1	0
11	3	CO2	1	0
12	3	CO2	1	0
13	3	CO2	1	0
14	3	CO2	1	0
15	3	CO2	1	0
16	3	CO2	1	0
17	3	CO2	1	0
18	3	CO2	1	0
19	3	CO2	1	0
20	3	CO2	1	0
21	3	CO2	1	0
22	3	CO2	1	0
23	3	CO2	1	0
24	3	CO2	1	0
25	3	CO2	1	0
26	3	CO2	1	0
27	3	CO2	1	0
28	3	CO2	1	0
29	3	CO2	1	0
30	3	CO2	1	0
31	3	CO2	1	0
32	3	CO2	1	0
33	3	CO2	1	1
34	3	CO2	1	0
35	3	CO2	1	0
36	3	CO2	1	0

## Sheet: long-term memory
no. of bees	colony	treatment	learning after 6 sessions (1-reaction/0-no reaction)	test (1-reaction/0-no reaction)			long-term memory test
1	1	control	1	1					no. of bees
2	1	control	1	1			colony	treatment	reaction	no reaction
3	1	control	1	1			1	control	16	4
4	1	control	1	0			1	CO2	5	15
5	1	control	1	1			2	control	15	2
6	1	control	1	1			2	CO2	4	14
7	1	control	1	1			3	control	27	7
8	1	control	1	1			3	CO2	9	25
9	1	control	1	1
10	1	control	1	1
11	1	control	1	0
12	1	control	1	1
13	1	control	1	1
14	1	control	1	1
15	1	control	1	1
16	1	control	1	1
17	1	control	1	0
18	1	control	1	1
19	1	control	1	1
20	1	control	1	0
1	1	CO2	1	1
2	1	CO2	1	0
3	1	CO2	1	0
4	1	CO2	1	0
5	1	CO2	1	0
6	1	CO2	1	0
7	1	CO2	1	1
8	1	CO2	1	0
9	1	CO2	1	1
10	1	CO2	1	0
11	1	CO2	1	1
12	1	CO2	1	0
13	1	CO2	1	0
14	1	CO2	1	0
15	1	CO2	1	0
16	1	CO2	1	0
17	1	CO2	1	0
18	1	CO2	1	1
19	1	CO2	1	0
20	1	CO2	1	0
1	2	control	1	1
2	2	control	1	1
3	2	control	1	1
4	2	control	1	1
5	2	control	1	1
6	2	control	1	1
7	2	control	1	0
8	2	control	1	1
9	2	control	1	1
10	2	control	1	1
11	2	control	1	1
12	2	control	1	1
13	2	control	1	1
14	2	control	1	1
15	2	control	1	1
16	2	control	1	0
17	2	control	1	1
1	2	CO2	1	0
2	2	CO2	1	0
3	2	CO2	1	0
4	2	CO2	1	0
5	2	CO2	1	0
6	2	CO2	1	0
7	2	CO2	1	0
8	2	CO2	1	1
9	2	CO2	1	1
10	2	CO2	1	0
11	2	CO2	1	1
12	2	CO2	1	0
13	2	CO2	1	0
14	2	CO2	1	0
15	2	CO2	1	1
16	2	CO2	1	0
17	2	CO2	1	0
18	2	CO2	1	0
1	3	control	1	1
2	3	control	1	1
3	3	control	1	1
4	3	control	1	0
5	3	control	1	1
6	3	control	1	1
7	3	control	1	1
8	3	control	1	1
9	3	control	1	0
10	3	control	1	1
11	3	control	1	1
12	3	control	1	0
13	3	control	1	1
14	3	control	1	0
15	3	control	1	1
16	3	control	1	1
17	3	control	1	1
18	3	control	1	0
19	3	control	1	1
20	3	control	1	1
21	3	control	1	1
22	3	control	1	1
23	3	control	1	1
24	3	control	1	1
25	3	control	1	0
26	3	control	1	1
27	3	control	1	1
28	3	control	1	1
29	3	control	1	1
30	3	control	1	1
31	3	control	1	1
32	3	control	1	1
33	3	control	1	1
34	3	control	1	0
1	3	CO2	1	0
2	3	CO2	1	0
3	3	CO2	1	0
4	3	CO2	1	1
5	3	CO2	1	0
6	3	CO2	1	0
7	3	CO2	1	0
8	3	CO2	1	0
9	3	CO2	1	0
10	3	CO2	1	1
11	3	CO2	1	0
12	3	CO2	1	0
13	3	CO2	1	1
14	3	CO2	1	0
15	3	CO2	1	0
16	3	CO2	1	0
17	3	CO2	1	1
18	3	CO2	1	1
19	3	CO2	1	0
20	3	CO2	1	0
21	3	CO2	1	0
22	3	CO2	1	0
23	3	CO2	1	0
24	3	CO2	1	0
25	3	CO2	1	0
26	3	CO2	1	0
27	3	CO2	1	1
28	3	CO2	1	0
29	3	CO2	1	1
30	3	CO2	1	0
31	3	CO2	1	0
32	3	CO2	1	1
33	3	CO2	1	1
34	3	CO2	1	0
